# Supplementary material for: Anticancer effects of ikarugamycin and astemizole identified in a screen for stimulators of cellular immune responses
Source: HighWire-hosted journal article supplement (doi:10.1136/jitc-2023-006785), 2023-07-01
Supplement: jitc-2023-006785supp002_data_supplement.xlsx [file jitc-2023-006785supp002_data_supplement.xlsx]

## Sheet: Neurotransmmiter lib
Name	Normalized ratio
3,7-Dimethyl-1-propargylxanthine	0.443268
BNTX maleate	0.529027
SACLOFEN	0.539321
MDL-72222	0.59932
Salbutamol hemisulfate	0.599395
Quipazine dimaleate	0.615637
Alloxazine	0.644331
8-Hydroxy-DPAT·HBr	0.656846
ICI 89406	0.657714
Metergoline phenylmethyl ester	0.66092
DL-2-Amino-3-phosphonoproprionic acid	0.665725
RS 17053·HCl	0.669983
Ibotenic acid	0.670831
Rilmenidine hemifumarate	0.670932
Cimaterol	0.671109
NAN-190·HBr	0.672329
1,3-Dipropyl-8-phenylxanthine	0.678619
MG 624	0.67899
1-Allyl-3,7-dimethyl-8-p-sulfophenylxanthine	0.688416
(-)-N6-(2-Phenylisopropyl)adenosine	0.69277
SR 57227·HCl	0.69361
(S)-4-Carboxyphenylglycine	0.702963
1-Phenylbiguanide·HCl	0.705916
Cyproheptadine·HCl	0.707102
McN A-343	0.71042
Procaterol·HCl	0.714872
Gallamine triiodide	0.715865
S-Sulfo-L-cysteine sodium salt	0.716145
GBR 13069·2HCl	0.71662
Paraxanthine	0.721226
3-α-[(4-chlorophenyl)phenylmethoxy]tropane·HCl	0.722406
(RS)-4-Phosphonophenylglycine	0.72272
N-MPPP·HCl	0.723264
2-Methylserotonin·HCl	0.726699
ARC 239·2HCl	0.729625
Isoguvacine·HCl	0.729972
(N)-α-methylhistamine·2HCl	0.731386
Bromocriptine mesylate	0.732034
Dipydridamole	0.732034
GBR 12935·2HCl	0.732355
Endomorphin-1	0.732391
Mianserin·HCl	0.734232
L-745,870·3HCl	0.736619
Ketanserin	0.736823
NCS-382	0.738876
GBR 12783·2HCl	0.739411
Imiloxan·HCl	0.743169
Fluoxetine·HCl	0.744536
alpha-ERGOCRYPTINE	0.747938
Dobutamine·HCl	0.748211
Pergolide mesylate	0.752756
1-Allyl-3,7-dimethyl-8-phenylxanthine	0.756525
3α-Bis-(4-fluorophenyl)methoxytropane·HCl	0.757734
Clenbuterol	0.76161
Fluphenazine·2HCl	0.767135
SDZ SER 082 fumarate	0.767886
LE 300	0.771084
R(+)-6-BROMO-APB·HBr	0.775043
R(-)-2,10,11-Trihydroxyaporphine·HBr	0.780509
Cabergoline	0.781185
N,N-diethyl-2-[4-(phenylmethyl)phenoxy]ethanamine fumarate	0.782757
(±)-Cyanopidolol hemifumarate	0.784347
( R )-α-amino-3-hydroxy-5-methyl-4-isoxazolepropionic acid	0.78547
Dihydroergocristine mesylate	0.78571
Morphiceptin	0.786106
Chlorpromazine·HCl	0.788651
Spiroxatrine	0.788698
α-Neoendorphin	0.788978
Pizotifen maleate	0.788989
N-Methylquipazine dimaleate	0.789942
7-Hydroxy-DPAT·HBr	0.790495
Ergocornine	0.791909
Tropicamide	0.79253
( R )-3-carboxy-4-hydroxyphenylglycine	0.797924
Telenzepine·2HCl	0.79959
SKF 38393·HBr	0.801312
Metaproteranol hemisulfate	0.801893
3-Isobutyl-1-methylxanthine	0.802087
(+)-N6-(2-Phenylisopropyl)adenosine	0.802165
UK 14,304	0.802243
4-Hydroxyphenethylamine·HCl	0.802397
Butyrylcholine chloride	0.803494
1-Acetyl-4-methylpiperazine·HCl	0.804265
U-54494A·HCl	0.807709
1-[1-(2-Benzo[b]thienyl)cyclohexyl)]piperidine maleate	0.80783
IPAG	0.809512
PHCCC	0.809514
RS 56812·HCl	0.811324
N-Desmethylclozapine	0.811398
Loxapine succinate	0.812199
Muscimol	0.812351
BMY 7378·2HCl	0.813276
FG 7142	0.813276
PD 168077 maleate	0.818899
R-(+)-Atenolol	0.819666
Clozapine	0.820494
Trifluoperazine·2HCl	0.820675
Naloxnazine.2HCl	0.822624
Agmatine sulfate	0.822845
RS 79948·HCl	0.82399
Risperidone	0.824775
2-Methyl-6-(phenylethynyl)pyridine.HCl	0.824803
Y-25130·HCl	0.826089
trans-4-Aminocrotonic acid	0.826489
1,3-Dipropyl-7-methylxanthine	0.826656
Naloxone·HCl	0.829347
Levallorphan tartrate	0.829491
2-Iodomelatonin	0.830953
S(-)-sulpiride	0.831111
Hydroxytacrine maleate	0.832115
3-Methyl-GABA	0.833064
Chlormethiazole·HCl	0.8336
Caffeine	0.833887
1-(1-Naphthyl)piperazine·HCl	0.834605
m-Chlorophenylbiguanide·HCl	0.834748
Betaxolol·HCl	0.836072
(RS)-alpha-Methyl-4-phosphonophenylglycine	0.836133
Dipropyldopamine·HBr	0.83811
Thioridazine·HCl	0.838567
B-HT 920·2HCl	0.83958
MK 212·HCl	0.841642
6,7-ADTN·HBr	0.842378
Thioperamide maleate	0.843043
Nalbuphine·HCl dihydrate	0.843756
(S)-Timolol maleate	0.84402
Endomorphin-2	0.84414
1-Benzyl-1-methyl-4-cyclopentylmethoxycarbonylpiperidinium bromide	0.845041
Primidone	0.847517
(1S,9R)-(+)-β-Hydrastine	0.847891
GBR-12909·2HCl	0.849263
1-(4'-aminophenyl)-3,5-dihydro-7,8-dimethoxy-4H-2,3-benzodiazepin-4-one	0.850006
Ergonovine maleate	0.850217
(RS)-(±)-Sulpiride	0.850466
3-Hydroxymethyl-β-carboline	0.850466
Clothiapine	0.851784
Naltrindole·HCl	0.853836
Dibenzipine·HCl	0.856102
Dermorphin	0.85671
cis-4-Aminocrotonic acid	0.857017
(S)-(-)-Pindolol	0.857399
7-(Hydroxyimino)cyclopropa[b]chromen-1a-carboxylate ethyl ester	0.858167
Haloperidol·HCl	0.858902
β-Casomorphin (human)	0.85899
Pirenzepine·2HCl	0.859381
1-(3-trifluoromethyl) phenylpiperazine·HCl	0.859592
Maprotiline·HCl	0.860047
L-741,626	0.861725
ZM 241385	0.862745
Imipramine·HCl	0.863815
4-Phenyl-1,2,3,4-tetrahydroisoquinoline·HCl	0.863922
Dopamine·HCl	0.86623
Gramine	0.868929
5,7-dichlorokynurenic acid	0.869652
N-Methyldopamine·HCl	0.869795
4-Acetyl-1,1-dimethylpiperazinium iodide	0.869997
Dilazep·HCl	0.870663
PD 116,948	0.871674
Spiroxatrine	0.871705
Etonitazenyl isothiocyanate	0.872975
(-)-Cytisine	0.873066
Synthalin sulfate	0.873614
U-69593	0.873661
LY 367385	0.874101
Salvinorin A	0.874141
Kyotorphin	0.875037
CGP 46381	0.875737
Carbamylcholine chloride	0.87574
(1,2,5,6-Tetrahydropyridin-4-yl)methylphosphinic acid	0.876408
Venlafaxine·HCl	0.876704
CGP 35348	0.876877
(+)-AJ-76·HCl	0.877172
Clomipramine·HCl	0.877668
S-(4-Nitrobenzyl)-6-thioinosine	0.877816
Hexamethylene-bis-[dimethyl-(3-phthalimidopropyl)ammonium] dibromide	0.878393
Karakoline	0.878895
CY 208-243	0.879165
S-(-)-Atenolol	0.880329
Galanthamine·HBr	0.881723
R(-)-2,10,11-Trihydroxy-N-propyl-noraporphine·HBr	0.881815
ICI 215,001·HCl	0.882088
5-Iodotubericidin	0.882637
(+)-Muscarine chloride	0.882741
LY-163,502·2HCl	0.884686
(-)-Quinpirole·HCl	0.884795
N6-Methyladenosine	0.885589
L-693,403 maleate	0.88595
RS 23597-190·HCl	0.888119
LY-165,163	0.888202
Loratidine	0.888865
Pindolol	0.888941
L-cysteinesulfinic acid	0.88895
Naftopidil·HCl	0.889937
Aceclidine·HCl	0.892798
(±)-Isoproterenol·HCl	0.894228
(±)-Atenolol	0.894319
PK-11195	0.89439
L-750,667·3HCl	0.894529
U-99194A maleate	0.894974
AMI-193	0.897192
N-methyl-D-aspartic acid (NMDA)	0.897883
Serotonin·HCl	0.900884
BRL 37344 sodium salt	0.902458
Remoxipride·HCl	0.905081
3-Deazaadenosine	0.909081
SNC 121	0.909811
Ambenonium chloride	0.910748
CGP 55845·HCl	0.911767
SNC-162	0.912812
3-Hydroxyphenethylamine·HCl	0.914
M-6434	0.914158
Nisoxetine·HCl	0.914174
R(-)-Propylnorapomorphine·HCl	0.914216
PNU 96415E	0.914422
SDZ 205-557·HCl	0.914532
GBLD 345	0.914532
(±)-Erythro-9-(2-hydroxy-3-nonyl)adenine·HCl	0.914748
Ropinirole HCl	0.915442
Paroxetine·HCl	0.915712
S(-)-raclopride tartrate	0.916366
DIPPA·HCl	0.917426
Pronathelol·HCl	0.918458
Citalopram·HBr	0.918734
DMCM·HCl	0.919214
Ondansetron	0.919427
N6-(4-Aminobenzyl)-N-methylcarboxamidoadenosine	0.921218
SIB 1893	0.923329
R(-)-2,11-dihydroxy-10-methoxyapomorphine·HCl	0.924731
ZAPA sulfate	0.926529
BD 1047·2HBr	0.926638
Deltorphin II	0.928665
Fenoldopam·HCl	0.928913
L(+)-2-amino-5-phosponovaleric acid	0.933874
Xamoterol hemifumarate	0.936478
1-Methyladenosine	0.93714
(D-Thr2)-Leu-enkephalin-Thr	0.93804
Promethazine·HCl	0.938164
Yohimbine·HCl	0.93934
Olanzapine	0.93939
Clozapine	0.940082
(S)-alpha-Methyl-4-carboxyphenylglycine	0.940742
Ziprasidone·HCl·H2O	0.940928
A 61603·HBr	0.94107
GR 89696.fumarate	0.941853
AH 11110A·HCl	0.942584
SKF 97541	0.943214
A-77636·HCl·H2O	0.944679
RO 04-6790	0.94614
Isoniazid	0.94614
1-Aminocyclopropanecarboxylic acid	0.948703
Naltriben mesylate	0.951313
(-)-Bicuculline methobromide	0.952359
S-(4-Nitrobenzyl)-6-thioguanosine	0.952612
Leu-Valorphin-Arg	0.954593
SB 203186·HCl	0.954834
5-Methylurapidil	0.956418
trans-7-Hydroxy-PIPAT maleate	0.956657
ZD 7114·HCl	0.956853
N-[2-(piperidinylamino)ethyl]-4-iodobenzamide	0.956942
(±)-N-allylnormetazocine·HCl	0.957116
5-Methoxytryptamine·HCl	0.957789
FGIN-1-43	0.957789
Phaclofen	0.958104
Domperidone	0.959116
Strychnine·HCl	0.959991
(RS)-alpha-Methyl-4-tetrazolylphenylglycine	0.960887
Propranalol glycol	0.960903
Spiperone·HCl	0.961377
2-Phenylmelatonin	0.962938
(S)-3,5-Dihydroxyphenylglycine	0.96306
Dihydroergocristine mesylate	0.963307
SNC 80	0.964072
Efaroxan·HCl	0.964545
CGP 54626·HCl	0.964839
Alprenolol·HCl	0.965193
Clobenpropit·2HBr	0.965595
AF-DX 116	0.966826
4-Diphenylacetoxy-N-methylpiperidine iodide	0.967639
2-Amino-4-(3-hydroxy-5-methylisoxazol-4-yl)butyric acid	0.968348
(±)-Metaprolol tartrate	0.97056
Neostigmine bromide	0.97154
Bopindolol malonate	0.971728
(RS)-alpha-Methyl-4-sulfonophenylglycine	0.972153
4-phenyl-1-(4-phenylbutyl)piperidine maleate	0.972244
Methoxamine·HCl	0.973208
5-Nonyloxytryptamine oxalate	0.974413
SCH 23390·HCl	0.974792
N6-2-(4-Aminophenyl)ethyladenosine	0.974952
trans-Triprolidine·HCl	0.976027
Mecamylamine hydrochloride	0.978194
Butylscopolammonium bromide	0.979748
(-)-Huperzine A	0.979953
(S)-3,4-Dicarboxyphenylglycine	0.980361
(+)-SK&F 10047·HCl	0.980957
Methysergide maleate	0.981328
FGIN-1-27	0.981328
Oxymetazoline·HCl	0.982166
Nitrocaramiphen·HCl	0.983503
(±)-SKF-82958·HBr	0.983763
2-MPMDQ	0.984785
L-anti-endo-3,4-Methanopyrroldinedicarboxylic acid	0.984908
Nicergoline	0.986204
CGP 12177·HCl	0.986268
Naloxone methiodide	0.986366
Gabaculine·HCl	0.986645
SKF 91488·2HCl	0.986692
(D-Ala2,N-Me-Phe4,glyol5)-Enkephalin	0.987335
CL 218872	0.987584
6-Nitroquipazine maleate	0.987947
(S)-(+)-α-methylhistamine·2HBr	0.9887
N-Chlorophenyl-N-hexylpiperazine	0.989389
CGP 20712A·2HCl	0.989585
1-[2-Chloro-6-[[(3-iodophenyl)methyl]amino]-9H-purin-9-yl]-1-deoxy-N-methyl-β-D-ribofuranuronamide	0.989588
3-(4-Allylpiperazin-1-yl)-2-quinoxalinecarbonitrile maleate	0.990567
8-(3-Chlorostyryl)caffeine	0.991876
Amthamine·2HBr	0.991945
Amperozide·HCl	0.992268
Lisuride maleate	0.992681
β-Funaltrexamine·HCl	0.993294
(D-Cys(tBu)2,Thr(tBu)6)-Leu-Enkephalin-Thr	0.993394
CGP 52432	0.993422
Picrotoxinin	0.993494
Oxymetazoline·HCl	0.995343
Flumazenil	0.995343
Famotidine	0.996851
Corynanthine	0.996932
GR 103691	0.99698
cis-(±)-N-methyl-N-[2-(3,4-dichlorophenyl)ETHYL]-2-(1-pyrrolidinyl)cyclohexamine	0.997327
(±)-2-(N-phenylethyl-N-propyl)amino-5-hydroxytetralin·HCl	0.99745
5-Carboxamidotryptamine maleate	0.997662
5'-N-Ethylcarboxamidoadenosine	0.997672
(2S,2'R,3'R)-2-(2',3'-Dicarboxycyclopropyl)glycine	1.00093
Pilocarpine·HCl	1.00133
Phentolamine mesylate	1.00144
Guanfacine·HCl	1.00226
Tiotidine	1.004
D-aspartic acid	1.00429
Fluperlapine	1.0048
Melperone HCl	1.0056
Isonicotinic acid	1.0056
Urapidil·HCl	1.00602
Bromoacetylcholine bromide	1.00655
A 68930·HCl	1.00733
Dynorphin B	1.00814
PNU 22394 HCl	1.00828
N6-P-Sulfophenyladenosine sodium salt	1.00867
Tropisetron·HCl	1.00984
1,3-Di-(2-tolyl)guanidine	1.01005
Homochlorcyclizine·2HCl	1.01243
(+)-Butaclamol·HCl	1.01321
(2S,1'S,2'R)-2-(Carboxycyclopropyl)glycine	1.01439
Doxorubicin·HCl	1.01483
Aniracetam	1.01483
Arcaine sulfate	1.01502
(±)-Tropanyl-2-(4-chlorophenoxy)butanoate maleate	1.01558
Sotalol·HCl	1.01589
ICI-118,551·HCl	1.0176
2-PMDQ	1.01846
N-Acetyltryptamine	1.01862
L-aspartic acid	1.01923
(-)-Nicotine	1.01947
Arecaidine propargyl ester tosylate	1.01991
Ipratropium bromide	1.01991
Mesulergine·HCl	1.02085
Guvacine·HCl	1.02321
ICI 199,441·HCl	1.02375
Gabazine	1.02387
NNC 63-0532	1.02453
(R)-(+)-HA-966	1.02676
L-Quisqualic acid	1.0271
Flupentixol	1.02778
Acetylcholine chloride	1.02851
4-Phenyl-2-proprionamidotetralin	1.02954
Felbamate	1.03034
SIB 1757	1.03071
(R)-(-)-α-methylhistamine·2HBr	1.0322
Adenosine amine congener	1.03329
7-chloro-3-methyl-3,4-dihydro-2H-1,2,4-benzothiadiazine-S,S-dioxide	1.03355
Cirazoline·HCl	1.03403
BRL 54443	1.03411
Arecaidine but-2-ynyl ester tosylate	1.03487
(S)-4-Carboxy-3-hydroxyphenylglycine	1.03749
5-Methylfurmethiodide	1.03761
Melatonin	1.03787
4,5,6,7-Tetrahydroisoxazolo[5,4-c]pyridin-3-ol·HCl	1.03797
SDZ 220-581	1.03812
U-62066 mesylate	1.03884
2-Chloroadenosine	1.03914
CGS 12066B dimaleate	1.03946
Buspirone·HCl	1.0401
GABA	1.04093
Kainic acid	1.04108
BRL-52537·HCl	1.04186
Fluvoxamine maleate	1.04335
Vigabatrin	1.04616
(-)-U-50488·HCl	1.04721
BMY 7378·2HCl	1.04726
(2S,4S)-4-Methylglutamic acid	1.04729
Dihydroergotamine mesylate	1.04757
Tacrine HCl	1.04856
Histamine	1.04998
DH 97	1.05192
5'-(N-Cyclopropyl)carboximidoadenosine	1.05266
WAY-100635 maleate	1.05393
Furafylline	1.05719
(±)-PD 128,907·HCl	1.05721
U-54494A·HCl	1.05737
(S)-α-amino-3-hydroxy-5-methyl-4-isoxazolepropionic acid	1.05738
IMETIT 2HBr	1.05778
Mepyramine maleate	1.05824
Desloratidine	1.05956
Memantine·HCl	1.06042
N6-Methyl-2'-deoxyadenosine	1.06098
Chloroethylclonidine·2HCl	1.0613
1-Deoxy-1-[6-[[(3-iodophenyl)methyl]amino]-9H-purin-9-yl]-N-methyl-β-D-ribofuranuronamide	1.06179
BRL 44408 maleate	1.06213
Phenoxybenzamine·HCl	1.0623
(1S,3R,4S)-1-Aminocyclopentane-1,3,4-tricarboxylic acid	1.06273
MDL 73005EF·HCl	1.06327
Iodophenpropit·2HBr	1.06373
(+)-Tubocurarine chloride	1.06439
(Phe4)-dermorphin (1-4) amide	1.06455
GR 135531	1.0646
Suramin·6Na	1.06463
Xylazine	1.06484
Diphenhydramine·HCl	1.06543
VU 0155041	1.06796
(+)-PD 128907	1.07019
Mesoridazine besylate	1.07149
Glycine	1.07168
O-Phospho-L-serine	1.07176
α-methyl 5-hydroxytryptamine maleate	1.07185
L-trans-Pyrrolidine-2,4-dicarboxylic acid	1.07315
(±)-Epibatidine	1.07364
(R,S)-3-Hydroxyphenylglycine	1.07385
BD 1063·2HCl	1.07469
(±)-alpha-cyclopropyl-4-phosphonophenylglycine	1.07579
Pentamidine	1.07684
Adenosine	1.07852
Ketotifen fumarate	1.0788
Carbamyl-β-methylcholine chloride	1.07911
5-Chloroindole-2-carboxylic acid	1.07915
(±)-Baclofen	1.08031
BP 554 maleate	1.08039
(S)-(-)-Propranolol ·HCl	1.08115
Zilpaterol·HCl	1.08167
Tramadol·HCl	1.08213
8-Cyclopentyl-1,3-dipropylxanthine	1.08388
Ifenprodil hemitartrate	1.08414
Cimetidine	1.08529
(S)-(-)-HA-966	1.08536
Isamoltane hemifumarate	1.08588
Lobeline·HCl	1.08685
Piribedil·2HCl	1.0902
2-[1-(4-PIPERONYL)PIPERAZINYL]BENZOTHIAZOLE	1.09041
MRS 1220	1.09197
Dimaprit·2HCl	1.09379
RU 24969 hemisuccinate	1.09415
3-MPPI	1.09462
ICI-162,846	1.09479
Oxotremorine sesuifumarate	1.10003
BD 1008·2HBr	1.10315
Prazosin	1.10385
(2S)-alpha-Ethylglutamic acid	1.10504
Tropanyl 3,5-dimethylbenzoate	1.10524
Arecoline·HBr	1.10714
Hemicholinium-3·2HBr	1.10775
N-benzylnaltrindole·HCl	1.1082
L-(-)-Norepinephrine bitartrate monohydrate	1.10869
(9-Chloro-2-(2-furyl)(1,2,4)triazolo(1,5-C)quinazolin-5-amine)	1.11037
trans-Azetidine-2,4-dicarboxylic acid	1.11056
PRE-084·HCl	1.11202
D-serine	1.11323
D(-)-2-amino-5-phosponovaleric acid	1.11408
(R)-(-)-Apomorphine·HCl	1.11415
Tropanyl-2-(4-bromophenyl)propionate maleate	1.11433
Propofol	1.11453
5-methoxy-N-cyclopropanoyltryptamine	1.11547
L-741,742·HCl	1.11649
nor-Binaltorphimine·2HCl	1.11711
(RS)-alpha-Ethyl-4-carboxyphenylglycine	1.12148
N6-Methyladenosine-5'-monophosphate·Na	1.12341
γ-D-glutamylaminomethylsulfonic acid	1.12373
(RS)-(±)-sulpiride	1.12483
6-cyano-7-nitroquinoxaline-2,3-dione sodium	1.12838
(2R,4R)-4-Aminopyrrolidone-2,4-dicarboxylate	1.12852
6,7-dinitroquinoxaline-2,3-dione	1.1291
(±)-Anatoxin A fumarate	1.12911
DL-2-amino-5-phosponovaleric acid	1.13215
N6-Cyclohexyladenosine	1.13218
cis-2, 3-Piperidine dicarboxylic acid	1.13512
Cyanopidolol hemifumarate	1.13531
Pyridoxal-5'-phosphate-6-(2'-naphthylazo-6'-nitro-4',8'-disulfonate)·4Na (PPNDS)	1.13558
Physostigmine hemisulfate	1.13971
3α,21-Dihydroxy-5α-pregnan-20-one	1.14164
SYM 2081	1.14205
Naphazoline	1.14252
(±)-4-Amino-3-(5-chloro-2-thienyl)-butanoic acid	1.14311
NOCICEPTIN	1.14525
Naltrexone·HCl	1.14634
Carbetapentane citrate	1.14951
Pyridoxalphosphate-6-azophenyl-2',4'-disulfonic acid·4Na	1.15214
6,7-dichloroquinoxaline-2,3-dione	1.15378
(RS)-alpha-Methyl-4-carboxyphenylglycine	1.15572
1-(1,3-benzodioxol-5-ylcarbonylpiperidine	1.15785
3'-Fluorobenzylspiperone maleate	1.15978
Methiothepin maleate	1.1613
R-(+)-Propranolol·HCl	1.16191
2-Chloro-N6-cyclopentyladenosine	1.16201
WB 4101·HCl	1.16291
(±)-threo-3-Methylglutamic acid	1.16525
1-(3-Chlorophenyl)piperazine·HCl	1.16583
β-Belladonnine dichloroethylate	1.16947
2,4-dihydroxyphenylacetyl-L-asparagine	1.17005
L-701,252	1.17178
Pentylenetetrazole	1.17232
2,3-dioco-6-nitro-1,2,3,4-tetrahydrobenzo[F]quinoxaline-7-sulfonamide disodium salt	1.17239
1-(4-iodophenyl)-3-(1-Aadamantyl)-guanidine	1.17291
Theophylline	1.17393
(RS)-(tetrazol-5-YL)glycine	1.17488
Guanosine-5'-triphosphate·Na	1.17598
Nocistatin	1.1767
MM 77·2HCl	1.17802
(S)-2-Amino-2-methyl-4-phosphonobutanoic acid	1.17817
Idazoxan·HCl	1.17875
Cyclothiazide	1.17924
Orphenadrine citrate	1.18004
N6-Cyclopentyladenosine	1.18013
Cycloleucine	1.18046
L-Homocysteinesulfinic acid	1.18213
Propranolol·HCl	1.18232
GR 55562·2HCl	1.18437
(+)-MK 801 maleate	1.18603
Propentofylline	1.18619
3-MPPI	1.19058
1,1-Dimethyl-4-phenylpiperazinium iodide	1.19122
(RS)-1-amino-5-phosphonoindan-1-carboxylic acid	1.19155
L(-)-threo-3-Hydroxyaspartic acid	1.19316
CGS 19755	1.19445
2-Chloro-11-(4-methylpiperazino)dibenz[B,F]oxepin maleate	1.19453
8-(p-Sulfophenyl)theophylline	1.19504
7-(β-Hydroxyethyl)theophylline	1.19658
1-Aminocyclobutane-cis-1,3-dicarboxylic acid	1.19687
Imidazole-4-acetic acid·HCl	1.19793
Imperialine	1.19808
Mirtazepine	1.19963
RJR 2403 oxalate	1.20172
MR 16728·HCl	1.20191
ICI 204,448·HCl	1.20238
Methyllycaconitine citrate	1.204
(±)-1-aminocyclopentane-trans-1,3-dicarboxylic acid	1.20669
HEAT·HCl	1.20699
Nociceptin (1-13) NH2	1.20792
L-701,324	1.20844
Aminophylline	1.2094
8-Methoxy-2-proprionamidotetralin	1.20942
MDL 72832·HCl	1.21432
(±)-Vesamicol·HCl	1.2166
UPF 523	1.2169
Pancuronium dibromide	1.2227
SKF 89976A	1.22436
AMI-193	1.22546
Kynurenic acid	1.2263
Methylergometrine maleate	1.22843
(S)-SNAP 5114	1.22843
(+)-U-50488·HCl	1.22941
1-Aminocyclobutane-trans-1,3-dicarboxylic acid	1.23187
N-(N-benzylpiperidin-4-yl)-4-iodobenzamide	1.23305
Ranitidine·HCl	1.23411
(S)-3-Hydroxyphenylglycine	1.23821
(S)-3-Carboxy-4-hydroxyphenylglycine	1.24006
Ticlopidine·HCl	1.2491
(-)-Epinephrine bitartrate	1.25255
Dextromethorphan	1.2541
(2S,1'S,2'S)-2-(Carboxycyclopropyl)glycine	1.25582
6-[2-(4-imidazolyl)ethylamino]-N-(4-trifluoromethylphenyl)heptanecarboxamide dimaleate	1.25606
Chlorisondamine diiodide	1.25838
SDM25N·HCl	1.26141
NF 023	1.26221
(+)-UH 232 maleate	1.26416
Spermine·4HCl	1.26462
N-Acetylglycyl-D-glutamic acid	1.26814
Chlormezanone	1.26816
L(+)-2-amino-4-phosphonobutanoic acid	1.26836
β,γ-Methyleneadenosine 5'-triphosphate·2Na	1.271
Clonidine·HCl	1.27391
(Leu5)-enkephalin	1.27495
α,β-Methyleneadenosine-5'-diphosphate·Na	1.27933
Cinanserin·HCl	1.28088
(RS)-3,5-Dihydroxyphenylglycine	1.28568
Rauwolscine·HCl	1.28792
IMMEPIP 2HBr	1.28913
L-glutamic acid	1.29213
(±)-Lisofylline	1.29234
Delcorine	1.29291
(D-Ala2,N-Me-Phe4, methionin (O)-ol5)-enkephalin	1.29706
8-Cyclopentyltheophylline	1.29805
BW 723C86·HCl	1.29919
(RS)-alpha-Methylserine-O-phosphate	1.30127
(3α,5β)-3-Hydroxy-pregnan-20-one	1.30191
Homoquinolinic acid	1.30212
(1R,3R,4S)-1-aminocyclopentane-1,3,4-tricarboxylic acid	1.30262
Zolantidine dimaleate	1.3042
Methyl-β-carboline-3-carboxylate	1.30445
BRL 15572·HCl	1.30504
ATP disodium salt	1.3061
1-Methyl-4-[2-(2-naphthyl)-ethenyl]-pyridinium iodide	1.3089
DSLET	1.30954
2-(α-Naphthoyl)-ethyltrimethylammonium iodide	1.31027
Riluzole·HCl	1.31192
Metoclopramide·HCl	1.31202
Dynorphin A (2-13)	1.31215
Butyl-β-carboline-3-carboxylate	1.31261
7-Chlorokynurenic acid	1.31564
(±)-U-50488·HCl	1.31893
trans-4-Hydroxycrotonic acid	1.32234
Ivermectin	1.32526
(D-Arg2,Lys4)-Dermorphin (1-4) amide	1.33048
Propyl-β-carboline-3-carboxylate	1.33057
NNC-711·HCl	1.33296
DADLE	1.33892
Luzindole	1.33903
L-689,560	1.34025
Dynorphin A (1-8)	1.34137
D(-)-2-amino-4-phosphonobutanoic acid	1.3429
5-[(DIMETHYLAMINO)METHYL]-3-(1-METHYL-1H-INDOL-3-YL)-1,2,4-OXADIAZOLE	1.35705
Decamethonium bromide	1.364
D-(-)-glutamic acid	1.36948
Aminobenztropine	1.37172
Uridine-5'-monophosphate	1.37414
3-n-Propylxanthine	1.37449
γ-D-glutamylglycine	1.37843
Benzoquinonium dibromide	1.3889
Adenosine-5'-monophosphate (AMP)	1.3894
6-Chloromelatonin	1.39242
1-Amino-5-bromouracil	1.39364
Tizanidine·HCl	1.39641
Uridine-5'-diphosphate	1.40231
Dynorphin A (1-13)	1.40357
Fluorocurarine chloride	1.40519
2-Methylthioadenosine triphosphate	1.40905
S-Adenosyl-L-homocysteine	1.41448
Guanabenz	1.43007
Terfenadine	1.43008
P1,P4-DI(adenosine-5')tetraphosphate ammonium salt	1.43049
Ethyl-β-carboline-3-carboxylate	1.44063
Atropine sulfate	1.44824
(Met5)-enkephalin	1.45174
Dihydroergocristine mesylate	1.45304
Uridine-5'-triphosphate·3Na	1.4566
Adenosine-5'-diphosphoribose	1.46745
Dihydro-β-erythroidine·HBr	1.47285
Adenosine-5'-diphosphate (ADP)	1.48496
Clopidogrel sulfate	1.48935
Spermidine·3HCl	1.53614
NF 279	1.57387
α,β-Methyleneadenosine 5'-triphosphate	1.5764
Anpirtoline·HCl	1.5853
Amoxapine	1.61025
Astemizole	2.03951

## Sheet: Prestwick lib
Name	Normalized ratio
Budesonide	0
Zopiclone	0
Cyclosporin A	0.0743328
Clobetasol propionate	0.0951333
Oxethazaine	0.0964277
Papaverine hydrochloride	0.0986091
Sibutramine HCl	0.10194
Sisomicin sulfate	0.122727
Etifenin	0.122989
Metaproterenol sulfate, orciprenaline sulfate	0.134923
Bromperidol	0.137743
Metformin hydrochloride	0.149554
Moroxidine hydrochloride	0.155196
Ornidazole	0.155196
Fluticasone propionate	0.168475
Nystatine	0.173742
Imipenem	0.176103
Acenocoumarol	0.184562
Methylprednisolone, 6-alpha	0.188135
Idoxuridine	0.196418
Amcinonide	0.201046
Busulfan	0.20914
Hydralazine hydrochloride	0.20914
Biperiden hydrochloride	0.227249
Sulfasalazine	0.245741
Ethacrynic acid	0.256105
Etretinate	0.264155
Benoxinate hydrochloride	0.273963
Isoflupredone acetate	0.274887
Cyclizine hydrochloride	0.27656
Haloprogin	0.279774
Trimethadione	0.285609
Tolazoline hydrochloride	0.296526
Yohimbine hydrochloride	0.297607
Pheniramine maleate	0.30122
Amiodarone hydrochloride	0.305219
Lovastatin	0.309805
Mercaptopurine	0.313286
Rimexolone	0.314267
Cilostazol	0.317354
Butoconazole nitrate	0.324063
Clobutinol hydrochloride	0.324836
Vigabatrin	0.330329
Iohexol	0.334985
Chenodiol	0.335512
Hydrochlorothiazide	0.340996
Aniracetam	0.351021
Oxybutynin chloride	0.354512
Cyclobenzaprine hydrochloride	0.355203
Clomipramine hydrochloride	0.36046
Triamterene	0.365197
Meticrane	0.366859
Amphotericin B	0.382663
Urapidil hydrochloride	0.383602
Cephalosporanic acid, 7-amino	0.385052
Temozolomide	0.394303
Pepstatin A	0.396221
Fluocinolone acetonide	0.396301
Cetirizine dihydrochloride	0.409934
Diethylcarbamazine citrate	0.414682
Morpholinoethylamino-3-benzocyclohepta-(5,6-c)-pyridazine dihydrochloride	0.415065
Amisulpride	0.430653
Spiperone	0.431092
Pyrilamine maleate	0.434259
Praziquantel	0.438338
Nisoxetine hydrochloride	0.439276
Quinethazone	0.442283
Cisapride	0.443878
Heptaminol hydrochloride	0.444293
Daunorubicin hydrochloride	0.446267
Chloramphenicol	0.447026
Thyroxine (L)	0.447071
Minoxidil	0.44919
Dimethisoquin hydrochloride	0.449243
Cytarabine	0.449243
Trichlorfon	0.450682
Nifedipine	0.453307
Nabumetone	0.457875
Etomidate	0.46349
Benzydamine hydrochloride	0.464488
Sulfinpyrazone	0.469382
Sulfacetamide sodic hydrate	0.476123
Timolol maleate salt	0.477561
Albendazole	0.478673
Chlortetracycline hydrochloride	0.479563
Nifenazone	0.479563
Zotepine	0.480171
Benazepril HCl	0.480319
Quinidine hydrochloride monohydrate	0.480738
Valacyclovir hydrochloride	0.481108
Ethynodiol diacetate	0.483671
Amprolium hydrochloride	0.48607
Racecadotril	0.486978
Talampicillin hydrochloride	0.487475
S-(+)-ibuprofen	0.487795
Labetalol hydrochloride	0.488038
Amidopyrine	0.488597
Nitrofurantoin	0.488597
Clocortolone pivalate	0.489139
Buflomedil hydrochloride	0.490006
Troleandomycin	0.493182
Hexamethonium dibromide dihydrate	0.50293
Voriconazole	0.504326
Cefadroxil	0.514592
Dizocilpine maleate	0.516114
Aminopurine, 6-benzyl	0.516114
Doxorubicin hydrochloride	0.519977
Benzonatate	0.520808
Piretanide	0.521375
Etofenamate	0.52257
Azaguanine-8	0.523869
Estradiol Valerate	0.524203
Amifostine	0.527439
Mizolastine	0.529152
Tetramisole hydrochloride	0.531091
Prazosin hydrochloride	0.532412
Quetiapine hemifumarate	0.532551
Clotrimazole	0.538974
Sertaconazole nitrate	0.539339
Dyclonine hydrochloride	0.545321
Piperacetazine	0.545826
Fluspirilen	0.546947
Baclofen (R,S)	0.549349
Ethosuximide	0.549349
Fendiline hydrochloride	0.549922
Altretamine	0.552317
Mefenamic acid	0.555068
Carbarsone	0.555475
Penbutolol sulfate	0.555723
Roxatidine Acetate HCl	0.555749
Pyrvinium pamoate	0.560429
Rimantadine Hydrochloride	0.562133
Clonidine hydrochloride	0.562269
Stavudine	0.563118
Pyridoxine hydrochloride	0.563557
Levalbuterol hydrochloride	0.563764
Calcipotriene	0.564503
Adamantamine fumarate	0.564667
Sulfathiazole	0.56886
Metyrapone	0.570398
Homochlorcyclizine dihydrochloride	0.570864
Chicago sky blue 6B	0.573598
Prednisone	0.574747
Suloctidil	0.575237
Diloxanide furoate	0.575411
Prednisolone	0.578167
Erlotinib	0.579834
Diclazuril	0.583891
Ketorolac tromethamine	0.584025
Epitiostanol	0.584525
Brinzolamide	0.585926
Galanthamine hydrobromide	0.587149
Oxyphenbutazone	0.588158
D-cycloserine	0.589075
Chlorpromazine hydrochloride	0.595501
Tridihexethyl chloride	0.596807
Diprophylline	0.601263
Ticlopidine hydrochloride	0.603307
Meprylcaine hydrochloride	0.606664
Lorglumide sodium salt	0.608889
Alprenolol hydrochloride	0.609562
Cinnarizine	0.610538
Ethisterone	0.61149
Mifepristone	0.612897
Scopolamine hydrochloride	0.613738
Perhexiline maleate	0.616208
Vorinostat	0.618341
Oxprenolol hydrochloride	0.619845
Podophyllotoxin	0.622139
Clofilium tosylate	0.627322
Bumetanide	0.628151
Ondansetron Hydrochloride	0.628411
Pivampicillin	0.629883
Folic acid	0.630425
Testosterone propionate	0.630621
Danazol	0.631342
Aztreonam	0.631342
Fludrocortisone acetate	0.632186
Cefaclor hydrate	0.633239
Betamethasone	0.633416
Dibenzepine hydrochloride	0.633487
Dropropizine (R,S)	0.634294
Carisoprodol	0.634477
Lamivudine	0.634757
Dipyridamole	0.637388
Antimycin A	0.637388
L(-)-vesamicol hydrochloride	0.637838
Hydroflumethiazide	0.638031
Fusidic acid sodium salt	0.638105
Eburnamonine (-)	0.638302
Bacitracin	0.638364
Oxcarbazepine	0.640256
Methapyrilene hydrochloride	0.640767
Homosalate	0.641006
Sulbactam	0.645671
Acetylcysteine	0.646052
Cortisone	0.647669
Cefoperazone dihydrate	0.65138
Acefylline	0.651398
Bufexamac	0.65324
(+,-)-Octopamine hydrochloride	0.653538
Estrone	0.654415
Buspirone hydrochloride	0.654606
Valproic acid	0.655746
Carbetapentane citrate	0.656494
Iopanoic acid	0.656521
Tacrine hydrochloride	0.657218
Zoxazolamine	0.657685
Mepivacaine hydrochloride	0.661259
Amiloride hydrochloride dihydrate	0.662363
Abacavir Sulfate	0.663836
Pyrimethamine	0.66462
Apramycin	0.665025
Diacerein	0.6662
Levopropoxyphene napsylate	0.667749
Protriptyline hydrochloride	0.669909
Triprolidine hydrochloride	0.672105
Epiandrosterone	0.673581
Clavulanate potassium salt	0.673805
Glutethimide, para-amino	0.675947
Oxytetracycline dihydrate	0.676796
Meptazinol hydrochloride	0.676824
Perindopril	0.67796
Clioquinol	0.678184
Molsidomine	0.678275
Deoxycorticosterone	0.67921
Amyleine hydrochloride	0.679224
Pivmecillinam hydrochloride	0.679226
Fleroxacin	0.680078
Hydroxytacrine maleate (R,S)	0.680092
Oxybenzone	0.680631
Diperodon hydrochloride	0.683431
Hydrocortisone base	0.685316
Oxantel pamoate	0.685392
Nitrendipine	0.688783
Hymecromone	0.690238
Piperidolate hydrochloride	0.69062
Methantheline bromide	0.690806
Aminocaproic acid	0.692103
Pefloxacine	0.695123
Azacytidine-5	0.695627
Clomiphene citrate (Z,E)	0.695736
Imatinib	0.697287
Flurbiprofen	0.699821
Benzbromarone	0.700851
Acetopromazine maleate salt	0.700876
Minaprine dihydrochloride	0.701516
Bicalutamide	0.702503
Rabeprazole Sodium salt	0.702711
2-Chloropyrazine	0.704065
Phthalylsulfathiazole	0.704118
Loperamide hydrochloride	0.705498
Oxymetazoline hydrochloride	0.705498
Triflupromazine hydrochloride	0.706111
Nimodipine	0.706775
Retinoic acid	0.708778
Alfacalcidol	0.709065
Exemestane	0.710021
Cyanocobalamin	0.710108
Esmolol hydrochloride	0.711074
Pimozide	0.711468
Amlodipine	0.712431
Amodiaquin dihydrochloride dihydrate	0.712887
Modafinil	0.714039
Fluphenazine dihydrochloride	0.714307
Sertraline	0.714316
Famotidine	0.714585
Methocarbamol	0.714585
Proparacaine hydrochloride	0.715571
Moxonidine	0.715593
Beclomethasone dipropionate	0.717725
Sulpiride	0.722322
Ioversol	0.722923
Idazoxan hydrochloride	0.723007
Entacapone	0.723408
Itraconazole	0.723579
Disulfiram	0.724796
Sulfamethoxazole	0.724796
Carbimazole	0.72486
Acetaminophen	0.725319
Luteolin	0.725788
Allopurinol	0.727997
Tazobactam	0.728028
Fenoterol hydrobromide	0.728774
Pentetic acid	0.729821
Etilefrine hydrochloride	0.732398
Nocodazole	0.732896
Flutamide	0.732896
Aminophylline	0.733361
Epirizole	0.733424
Zafirlukast	0.73361
2-Aminobenzenesulfonamide	0.735239
Atracurium besylate	0.735359
Fluocinonide	0.73924
Mesalamine	0.739916
Quinapril HCl	0.740885
Acebutolol hydrochloride	0.741622
Rifaximin	0.742048
Acarbose	0.742868
Procyclidine hydrochloride	0.744361
(+,-)-Synephrine	0.744432
Deflazacort	0.745164
Captopril	0.746071
Ethamsylate	0.746087
Pindolol	0.747804
Phenelzine sulfate	0.747804
Phenoxybenzamine hydrochloride	0.748255
Oxaprozin	0.749253
Trimipramine maleate salt	0.752042
Probucol	0.752055
Fursultiamine Hydrochloride	0.752727
Rofecoxib	0.753084
Carteolol hydrochloride	0.753886
Dimenhydrinate	0.753984
Antazoline hydrochloride	0.754481
Spironolactone	0.755123
Trimethoprim	0.755123
Thonzonium bromide	0.755793
Cycloheximide	0.756261
Thiethylperazine dimalate	0.756552
Ritodrine hydrochloride	0.757387
Niclosamide	0.758939
Propoxycaine hydrochloride	0.759482
Atropine sulfate monohydrate	0.759596
Methylhydantoin-5-(D)	0.759856
Mometasone furoate	0.76045
Nadolol	0.76117
Gliclazide	0.76226
Celiprolol HCl	0.762574
Maprotiline hydrochloride	0.763489
Doxycycline hydrochloride	0.765429
Ceftazidime pentahydrate	0.765908
Dantrolene sodium salt	0.766056
Prochlorperazine dimaleate	0.766832
Toltrazuril	0.767342
Ketotifen fumarate	0.768286
Furazolidone	0.768728
Iodipamide	0.769513
Glimepiride	0.769557
Sulfabenzamide	0.769557
Nortriptyline hydrochloride	0.769812
Flavoxate hydrochloride	0.77039
Hesperidin	0.770608
Ticarcillin sodium	0.773349
Tizanidine HCl	0.7738
Thiostrepton	0.774166
Hexylcaine hydrochloride	0.774578
Verteporfin	0.775634
Parthenolide	0.775838
Ipsapirone	0.775905
Doxepin hydrochloride	0.776992
Procaine hydrochloride	0.778469
Ethamivan	0.779048
Isoxicam	0.77926
Pioglitazone	0.779374
Catharanthine	0.779374
Tropisetron HCl	0.779434
GBR 12909 dihydrochloride	0.781117
Paromomycin sulfate	0.781943
Topiramate	0.783271
Perphenazine	0.785602
Tolfenamic acid	0.785602
Trifluridine	0.785763
Clofibric acid	0.787235
Tribenoside	0.789606
Acetohexamide	0.789936
Bendroflumethiazide	0.790065
Moxalactam disodium salt	0.793522
Saquinavir mesylate	0.795821
Equilin	0.796267
Chloropyramine hydrochloride	0.796664
Ketoconazole	0.796715
Disopyramide	0.796827
Gabapentin	0.798196
Monensin sodium salt	0.799287
Oxibendazol	0.800785
Chlorpropamide	0.801073
Sertindole	0.801481
Azapropazone	0.803295
Clonixin Lysinate	0.804793
Etidronic acid, disodium salt	0.805854
Pyrithyldione	0.807108
Digoxin	0.809155
Benperidol	0.811028
Dicloxacillin sodium salt hydrate	0.81168
Monobenzone	0.81303
Aceclidine Hydrochloride	0.814383
Nicotinamide	0.81439
Biotin	0.814923
Amiprilose hydrochloride	0.815589
Methimazole	0.815678
Salmeterol	0.815717
Bupropion hydrochloride	0.816816
Diazoxide	0.817948
Riluzole hydrochloride	0.817948
Spectinomycin dihydrochloride	0.819251
Sulfameter	0.819712
Imidurea	0.820379
Fexofenadine HCl	0.820698
Merbromin	0.821188
Amoxapine	0.822431
Levamisole hydrochloride	0.822431
Clorgyline hydrochloride	0.824059
Bucladesine sodium salt	0.824473
Corticosterone	0.825545
Ambroxol hydrochloride	0.825591
Gentamicine sulfate	0.826117
Proglumide	0.826117
Milrinone	0.826777
Zonisamide	0.827222
Econazole nitrate	0.828258
Tolazamide	0.828476
Bretylium tosylate	0.829175
Acyclovir	0.830098
Mafenide hydrochloride	0.830098
Estradiol-17 beta	0.830945
Thimerosal	0.832342
Pralidoxime chloride	0.834208
Chlorothiazide	0.836197
Digoxigenin	0.838661
Meglumine	0.838763
Dosulepin hydrochloride	0.839525
Carbadox	0.839635
Carbamazepine	0.840943
Dehydroisoandosterone 3-acetate	0.841796
Dibucaine	0.842027
Nilutamide	0.843222
Raloxifene hydrochloride	0.843881
(S)-(-)-Cycloserine	0.845239
Dicumarol	0.846702
Ioxaglic acid	0.846933
Trapidil	0.846968
Ciprofloxacin hydrochloride monohydrate	0.847445
Oxolinic acid	0.847445
Glafenine hydrochloride	0.84753
Vinpocetine	0.847763
Vardenafil	0.848088
Penciclovir	0.848233
Urosiol	0.849306
Tomoxetine hydrochloride	0.849343
Alprostadil	0.849624
Fosfosal	0.850924
Cefsulodin sodium salt	0.850966
(-)-Isoproterenol hydrochloride	0.852221
Simvastatin	0.852528
Dolasetron mesilate	0.852633
Fipexide hydrochloride	0.852856
Nicardipine hydrochloride	0.854018
Mianserine hydrochloride	0.854399
Phenformin hydrochloride	0.854399
Thioguanosine	0.85457
(-)-Eseroline fumarate salt	0.856149
Todralazine hydrochloride	0.859696
Dichlorphenamide	0.859755
Misoprostol	0.861167
Norethindrone	0.861941
Naftifine hydrochloride	0.86325
Pregnenolone	0.86502
Guanadrel sulfate	0.865738
Acemetacin	0.866963
Clemastine fumarate	0.867594
Flunixin meglumine	0.868584
Ethionamide	0.869313
Zalcitabine	0.87117
Cefixime	0.871389
Piromidic acid	0.871685
Sulconazole nitrate	0.875039
(+)-Isoproterenol (+)-bitartrate salt	0.875457
Tolnaftate	0.876243
Nafcillin sodium salt monohydrate	0.878084
Amfepramone hydrochloride	0.879142
Tiratricol, 3,3',5-triiodothyroacetic acid	0.879142
Suprofen	0.880941
Decamethonium bromide	0.881016
Allantoin	0.881351
Clinafloxacin	0.881523
Gabexate mesilate	0.881599
(R) -Naproxen sodium salt	0.881696
Phenylbutazone	0.882867
Kanamycin A sulfate	0.883573
Bacampicillin hydrochloride	0.883864
Fomepizole	0.884078
Fulvestrant	0.8868
Pentylenetetrazole	0.8868
Diphemanil methylsulfate	0.887181
Dapsone	0.888807
Niridazole	0.888821
Streptomycin sulfate	0.889115
Azaperone	0.890028
Dydrogesterone	0.890655
Promethazine hydrochloride	0.891235
Propidium iodide	0.891673
Oxandrolone	0.891732
Tolbutamide	0.891732
Carbachol	0.891753
Drofenine hydrochloride	0.892766
Megestrol acetate	0.893527
Mevalonic-D, L acid lactone	0.895537
Ethynylestradiol 3-methyl ether	0.89686
Alfaxalone	0.897945
Isopropamide iodide	0.897947
Butenafine Hydrochloride	0.898581
Azathioprine	0.89895
Alverine citrate salt	0.89895
Lidocaine hydrochloride	0.899462
Alcuronium chloride	0.899937
Auranofin	0.90081
Mevastatin	0.901958
Dequalinium dichloride	0.902291
Tetracycline hydrochloride	0.903053
Indapamide	0.903053
Xamoterol hemifumarate	0.903804
Anethole-trithione	0.905908
Methazolamide	0.9065
Niacin	0.906636
Quinacrine dihydrochloride dihydrate	0.906726
Bephenium hydroxynaphthoate	0.906833
Ramipril	0.907157
Suxibuzone	0.910199
Fluorometholone	0.910199
Mexiletine hydrochloride	0.910681
Alclometasone dipropionate	0.910721
Rufloxacin	0.910765
Pergolide mesylate	0.911298
Mirtazapine	0.911455
Trimetazidine dihydrochloride	0.912629
Pipemidic acid	0.916324
Norethynodrel	0.916902
Dexfenfluramine hydrochloride	0.917043
Tosufloxacin hydrochloride	0.918456
Vidarabine	0.919419
Benfluorex hydrochloride	0.91962
Phensuximide	0.919718
Enalapril maleate	0.919906
Reserpine	0.920456
Iopamidol	0.922227
Viloxazine hydrochloride	0.922927
Nizatidine	0.922988
Pramipexole	0.923103
Doxylamine succinate	0.925216
Bosentan	0.925512
Mephenytoin	0.926121
Theobromine	0.926343
Norgestimate	0.926924
Desipramine hydrochloride	0.927118
Mitoxantrone dihydrochloride	0.927413
Cefotaxime sodium salt	0.929328
Ketoprofen	0.929328
Chlormadinone acetate	0.931027
Sulfamethizole	0.93166
Metergoline	0.932284
Bethanechol chloride	0.932355
Rifabutin	0.932442
Bisoprolol fumarate	0.932785
Rifapentine	0.934144
Meropenem	0.934277
Gestrinone	0.935244
Pinacidil	0.93628
Tioconazole	0.937473
Flumequine	0.937473
Sulfaguanidine	0.939656
Furaltadone hydrochloride	0.940046
Cromolyn disodium salt	0.941357
Dienestrol	0.94146
Carbidopa	0.942598
Benserazide hydrochloride	0.943301
Morantel tartrate	0.944676
Ethaverine hydrochloride	0.945322
Carbinoxamine maleate salt	0.946027
Pridinol methanesulfonate salt	0.946523
Florfenicol	0.947869
Clindamycin hydrochloride	0.947983
Mebendazole	0.947983
Nialamide	0.949319
Mebeverine hydrochloride	0.950523
Adrenosterone	0.950796
Isosorbide mononitrate	0.950847
Mecamylamine hydrochloride	0.952425
Iodixanol	0.953188
Zileuton	0.954087
Chlorhexidine	0.957237
Xylometazoline hydrochloride	0.957237
DO 897/99	0.958225
Chloroquine diphosphate	0.959064
Roxithromycin	0.959355
Oxalamine citrate salt	0.959681
Amitryptiline hydrochloride	0.960102
Aminohippuric acid	0.961046
Medrysone	0.961332
Zuclopenthixol dihydrochloride	0.961877
Edrophonium chloride	0.963752
Acetylsalicylsalicylic acid	0.963752
Chlorzoxazone	0.963752
Mephenesin	0.963752
Chlorprothixene hydrochloride	0.964861
Methoxamine hydrochloride	0.96541
Eserine hemisulfate salt	0.96614
Phenylpropanolamine hydrochloride	0.968516
Caffeine	0.968828
Penicillamine	0.969839
Isoetharine mesylate salt	0.970179
Tolmetin sodium salt dihydrate	0.971363
Propafenone hydrochloride	0.972036
Bupivacaine hydrochloride	0.972624
Sulfapyridine	0.972851
Bisacodyl	0.974866
Nalidixic acid sodium salt	0.975373
Azelastine HCl	0.976057
Clenbuterol hydrochloride	0.976387
Minocycline hydrochloride	0.977084
Darifenacin hydrobromide	0.977205
Propantheline bromide	0.977916
Diflunisal	0.978826
Dicyclomine hydrochloride	0.980519
Floxuridine	0.981044
Estriol	0.982485
Ethoxyquin	0.982842
Fenofibrate	0.983116
Glycopyrrolate	0.983126
Moclobemide	0.983921
Sulmazole	0.985006
Trihexyphenidyl-D,L Hydrochloride	0.985006
Alfadolone acetate	0.9858
Pilocarpine nitrate	0.987023
Methylergometrine maleate	0.987056
Lynestrenol	0.988052
Aceclofenac	0.988052
Tinidazole	0.989005
Cyclopentolate hydrochloride	0.989249
Trichlormethiazide	0.990053
Triflusal	0.990086
Bemegride	0.99103
Fentiazac	0.994503
(-) -Levobunolol hydrochloride	0.995433
Loxapine succinate	0.996593
Pyrantel tartrate	0.996593
Deptropine citrate	0.997191
Nicorandil	0.997938
Cloxacillin sodium salt	0.997938
Guanethidine sulfate	0.998171
Flurandrenolide	0.998896
Methyl benzethonium chloride	0.998896
Hycanthone	0.999138
DMSO	1
Indomethacin	1.00041
Dobutamine hydrochloride	1.00095
N-Acetyl-L-leucine	1.00118
Cyproheptadine hydrochloride	1.00204
Pargyline hydrochloride	1.00204
Isoxsuprine hydrochloride	1.00301
Lidoflazine	1.00393
Sarafloxacin	1.00452
Naproxen	1.00464
Pentobarbital	1.00608
Clozapine	1.00645
Clebopride maleate	1.00668
Primidone	1.00679
Proscillaridin A	1.00782
Serotonin hydrochloride	1.00813
Dihydroergotamine tartrate	1.00854
Phentolamine hydrochloride	1.00854
Dihydrostreptomycin sulfate	1.00854
Orphenadrine hydrochloride	1.00854
Racepinephrine HCl	1.00908
Erythromycin	1.01005
Etodolac	1.01005
Lansoprazole	1.01042
Meclofenoxate hydrochloride	1.01162
Methotrimeprazine maleat salt	1.01229
Ibutilide fumarate	1.01247
Moxisylyte hydrochoride	1.01255
Pranlukast	1.01326
Tremorine dihydrochloride	1.01452
Beta-Escin	1.01454
Isocarboxazid	1.01487
Methiazole	1.01506
Nandrolone	1.0156
Ifenprodil tartrate	1.01601
Acitretin	1.01709
Doxazosin mesylate	1.01836
Eucatropine hydrochloride	1.01909
4-aminosalicylic acid	1.01951
Escitalopram	1.02076
Fluvastatin sodium salt	1.02092
Flucytosine	1.02158
Estropipate	1.02265
Irinotecan hydrochloride trihydrate	1.02305
Methacycline hydrochloride	1.02318
Antipyrine	1.02371
Aprepitant	1.02432
Adiphenine hydrochloride	1.02489
Moricizine hydrochloride	1.02537
Tyloxapol	1.02557
Etoposide	1.02576
Neomycin sulfate	1.02655
Lomefloxacin hydrochloride	1.02655
Amethopterin (R,S)	1.02695
Theophylline monohydrate	1.02823
Terbutaline hemisulfate	1.02905
Lymecycline	1.02914
Vincamine	1.03024
Rolipram	1.03079
Methylatropine nitrate	1.03188
Diethylstilbestrol	1.03196
Canrenoic acid potassium salt	1.03225
Tropicamide	1.03225
Butylscopolammonium (n-) bromide	1.03343
Tamoxifen citrate	1.03345
Griseofulvin	1.03345
Mesoridazine besylate	1.03351
Olanzapine	1.03511
Nadifloxacin	1.03603
Gliquidone	1.03669
Metrizamide	1.03743
Neostigmine bromide	1.03787
Tiabendazole	1.03802
(-)-Emtricitabine	1.03925
Dextromethorphan hydrobromide monohydrate	1.03952
Lisinopril	1.04055
Chlorthalidone	1.04057
Proguanil hydrochloride	1.04112
Naphazoline hydrochloride	1.04141
Sulfadoxine	1.04271
Pimethixene maleate	1.04359
Sotalol hydrochloride	1.04383
Diphenhydramine hydrochloride	1.04424
Droperidol	1.04449
Dimethadione	1.04567
Guanfacine hydrochloride	1.04652
Omeprazole	1.04676
(-)-MK 801 hydrogen maleate	1.05027
Dimaprit dihydrochloride	1.0507
Spiramycin	1.05159
Furosemide	1.05165
Liranaftate	1.05184
Spaglumic acid	1.05231
Norcyclobenzaprine	1.053
Carvedilol	1.05361
Chlorambucil	1.05361
Miglitol	1.05462
Proadifen hydrochloride	1.05467
Dirithromycin	1.05562
Crotamiton	1.05605
Lithocholic acid	1.05617
Betaxolol hydrochloride	1.0568
Phentermine hydrochloride	1.05874
Nisoldipine	1.05924
(S)-(-)-Atenolol	1.05961
Prothionamide	1.06202
Verapamil hydrochloride	1.06225
Norfloxacin	1.06225
Pemirolast potassium	1.06302
Iobenguane sulfate	1.06307
Diltiazem hydrochloride	1.06307
Gemfibrozil	1.06307
Gabazine bromide	1.0631
Cloperastine hydrochloride	1.06317
Betahistine mesylate	1.06434
Oxfendazol	1.06447
Amrinone	1.06461
Gefitinib	1.06719
Succinylsulfathiazole	1.06719
Benzathine benzylpenicillin	1.06789
Hemicholinium bromide	1.06796
Nitrocaramiphen hydrochloride	1.06839
Norgestrel-(-)-D	1.06987
Thioperamide maleate	1.071
Tranilast	1.07101
Benzthiazide	1.0716
Levocabastine hydrochloride	1.07182
Ketanserin tartrate hydrate	1.0724
Amikacin hydrate	1.07256
Ribostamycin sulfate salt	1.07269
Guaiacol	1.07367
Androsterone	1.07368
Lacidipine	1.07453
Demeclocycline hydrochloride	1.07532
Guaifenesin	1.07559
Digitoxigenin	1.07609
Formestane	1.07728
Trazodone hydrochloride	1.07957
R(-) Apomorphine hydrochloride hemihydrate	1.08077
Ampyrone	1.08077
Sulfanilamide	1.08087
Nifuroxazide	1.08194
Gatifloxacin	1.08316
Butylparaben	1.08404
Zardaverine	1.08416
Amoxicillin	1.08532
Isoconazole	1.08619
Tibolone	1.08619
Indatraline hydrochloride	1.08645
Ethinylestradiol	1.08687
Mephentermine hemisulfate	1.08893
Guanabenz acetate	1.0893
Iproniazide phosphate	1.0893
Toremifene	1.09037
Clopamide	1.09316
Azacyclonol	1.09335
Tranylcypromine hydrochloride	1.09335
Glibenclamide	1.09408
Melengestrol acetate	1.0941
Bambuterol hydrochloride	1.09502
Niflumic acid	1.09769
Phenethicillin potassium salt	1.09845
Althiazide	1.09944
N-Acetyl-DL-homocysteine Thiolactone	1.09989
Bromopride	1.09989
Pranoprofen	1.10243
Terfenadine	1.1038
Fenbufen	1.1038
Tenoxicam	1.10516
Benzylpenicillin sodium	1.10544
Efavirenz	1.10563
Cortisol acetate	1.10826
(S)-propranolol hydrochloride	1.1086
S(-)Eticlopride hydrochloride	1.10895
Propofol	1.10913
Metixene hydrochloride	1.11009
Nicergoline	1.11026
Clemizole hydrochloride	1.11026
Balsalazide Sodium	1.11039
Chlorotrianisene	1.11084
Domperidone	1.11144
Dexamethasone acetate	1.11273
Fenbendazole	1.11273
Flumethasone	1.1128
Bromocryptine mesylate	1.11378
Ranitidine hydrochloride	1.11378
Iocetamic acid	1.11507
Atractyloside potassium salt	1.1153
Mefloquine hydrochloride	1.11667
Meclofenamic acid sodium salt monohydrate	1.11667
Quipazine dimaleate salt	1.11675
Iopromide	1.11757
Enilconazole	1.1188
Phenindione	1.1194
Sulfisoxazole	1.12054
Pyrazinamide	1.12087
Panthenol (D)	1.12118
Practolol	1.12265
Opipramol dihydrochloride	1.1231
Tiapride hydrochloride	1.12324
Sulindac	1.12642
Cinoxacin	1.12783
Cyproterone acetate	1.12783
Trifluoperazine dihydrochloride	1.12794
Butalbital	1.13037
Sulfadimethoxine	1.13333
Acetazolamide	1.13477
Pizotifen malate	1.13504
Pravastatin	1.13618
Telenzepine dihydrochloride	1.13706
Methylhydantoin-5-(L)	1.13707
(+) -Levobunolol hydrochloride	1.13909
Fenoprofen calcium salt dihydrate	1.13987
Clodronate	1.14008
Flunisolide	1.14098
Famprofazone	1.14098
Lofexidine	1.14337
Alexidine dihydrochloride	1.14339
(R)-Propranolol hydrochloride	1.14447
Benfotiamine	1.1446
Isosorbide dinitrate	1.1446
Demecarium bromide	1.14604
Lanatoside C	1.14663
Pramoxine hydrochloride	1.14663
Pipenzolate bromide	1.14794
Phenazopyridine hydrochloride	1.14821
Cefazolin sodium salt	1.14845
Trimeprazine tartrate	1.14952
Tetrahydrozoline hydrochloride	1.15006
Deferoxamine mesylate	1.15174
Clofazimine	1.1539
Flunarizine dihydrochloride	1.15491
Dioxybenzone	1.15523
Alfuzosin hydrochloride	1.15534
Probenecid	1.1557
Sulfaquinoxaline sodium salt	1.15656
Diosmin	1.15675
Cefepime hydrochloride	1.15878
Dehydrocholic acid	1.16029
Flufenamic acid	1.16029
Dipivefrin hydrochloride	1.16343
Molindone hydrochloride	1.16533
Methiothepin maleate	1.16688
Chlormezanone	1.16748
Colistin sulfate	1.16882
Sulfamethazine sodium salt	1.16894
Anthralin	1.16904
Miconazole	1.16961
Glipizide	1.1708
Piroxicam	1.1708
Ampicillin trihydrate	1.17098
Nimesulide	1.17098
(R)-(+)-Atenolol	1.17327
Vancomycin hydrochloride	1.17389
Trimethobenzamide hydrochloride	1.17606
Flubendazol	1.17639
Nitrofural	1.17658
Ascorbic acid	1.17659
Terconazole	1.17674
Homatropine hydrobromide (R,S)	1.17718
Tetrahydroxy-1,4-quinone monohydrate	1.17775
Flucloxacillin sodium	1.17954
Hexestrol	1.18018
Methacholine chloride	1.18143
Terazosin hydrochloride	1.18152
Imipramine hydrochloride	1.18559
Piperacillin sodium salt	1.18645
Clidinium bromide	1.18858
Prednicarbate	1.18937
Tripelennamine hydrochloride	1.18971
Picrotoxinin	1.19163
Benzocaine	1.19163
Arbutin	1.19286
Oxiconazole Nitrate	1.19351
Chlorcyclizine hydrochloride	1.19351
Alizapride HCl	1.19371
Picotamide monohydrate	1.19723
Prilocaine hydrochloride	1.19723
Ropinirole HCl	1.19761
Carbenoxolone disodium salt	1.19855
Folinic acid calcium salt	1.19909
Cefotiam hydrochloride	1.20001
Felbinac	1.20097
Betazole hydrochloride	1.20115
Formoterol fumarate	1.20324
Leflunomide	1.20363
Pirenzepine dihydrochloride	1.20364
Metoclopramide monohydrochloride	1.20364
Ambrisentan	1.2056
6-Furfurylaminopurine	1.20653
Cephalothin sodium salt	1.20653
Azlocillin sodium salt	1.20932
Tracazolate hydrochloride	1.21181
Dorzolamide hydrochloride	1.21241
Liothyronine	1.21272
Ebselen	1.21304
Zomepirac sodium salt	1.21417
Levodopa	1.21527
Clofibrate	1.21573
Meloxicam	1.21596
Nafronyl oxalate	1.21944
Sulfamethoxypyridazine	1.21957
Nomifensine maleate	1.22142
Pentolinium bitartrate	1.22142
Adenosine 5'-monophosphate monohydrate	1.22334
Isopyrin hydrochloride	1.22409
Pronethalol hydrochloride	1.22416
Zidovudine, AZT	1.22493
Isotretinoin	1.22496
Antipyrine, 4-hydroxy	1.22595
Fluvoxamine maleate	1.22664
Butacaine	1.22665
Topotecan	1.22688
Parbendazole	1.22709
Paroxetine Hydrochloride	1.2309
Ethopropazine hydrochloride	1.23115
Ranolazine	1.23145
Diphenidol hydrochloride	1.23161
Nylidrin	1.23199
Denatonium benzoate	1.23228
Stanozolol	1.2342
Propylthiouracil	1.23563
Atovaquone	1.2359
Ziprasidone Hydrochloride	1.23823
Hydroxyzine dihydrochloride	1.24305
Fenspiride hydrochloride	1.24305
Nadide	1.24681
Metoprolol-(+,-) (+)-tartrate salt	1.24786
Nifurtimox	1.24871
Meclocycline sulfosalicylate	1.25281
Tramadol hydrochloride	1.25528
Viomycin sulfate	1.25707
Rivastigmine	1.25977
Colchicine	1.2606
Tiaprofenic acid	1.26318
Naftopidil dihydrochloride	1.26489
Bepridil hydrochloride	1.26566
Canrenone	1.26604
Haloperidol	1.26653
Asenapine maleate	1.26653
Clorsulon	1.26841
Etanidazole	1.2686
Trioxsalen	1.2686
Pinaverium bromide	1.26889
Doxofylline	1.26889
Streptozotocin	1.2706
Ibandronate sodium	1.27466
Indoprofen	1.27485
Gallamine triethiodide	1.27679
Ofloxacin	1.27679
Hexetidine	1.27757
Cefotetan	1.27887
Ronidazole	1.27991
Ribavirin	1.28013
Levonordefrin	1.28087
Thiamphenicol	1.2873
Tetraethylenepentamine pentahydrochloride	1.28785
3-alpha-Hydroxy-5-beta-androstan-17-one	1.28846
N6-methyladenosine	1.28939
Ciclopirox ethanolamine	1.29065
Pancuronium bromide	1.29108
Naltrexone hydrochloride dihydrate	1.29523
Pentoxifylline	1.29523
Methotrexate	1.29561
Mefexamide hydrochloride	1.29561
Moxifloxacin	1.29699
Ifosfamide	1.2981
Ceforanide	1.29891
Sumatriptan succinate	1.29977
Warfarin	1.29977
Nefazodone HCl	1.30144
Metolazone	1.3022
Thalidomide	1.3022
Ganciclovir	1.30534
Thioridazine hydrochloride	1.30872
Procarbazine hydrochloride	1.30968
Zimelidine dihydrochloride monohydrate	1.31206
Etofylline	1.31206
Halcinonide	1.31433
Sulfachloropyridazine	1.31433
THIP Hydrochloride	1.31488
Nalmefene hydrochloride	1.32146
Halofantrine hydrochloride	1.32149
Cefdinir	1.32268
Procainamide hydrochloride	1.32372
Ozagrel hydrochloride	1.32437
Artemisinin	1.32571
Oxacillin sodium	1.32659
Avermectin B1a	1.3272
Cefuroxime sodium salt	1.3272
Pempidine tartrate	1.33894
Cimetidine	1.34091
Memantine Hydrochloride	1.34215
Bifonazole	1.34665
Cyclopenthiazide	1.34834
Bezafibrate	1.34893
Sulfamonomethoxine	1.34939
Flecainide acetate	1.35484
Selegiline hydrochloride	1.35586
Ethotoin	1.35685
Didanosine	1.3599
Hyoscyamine (L)	1.3599
Cladribine	1.36584
Venlafaxine	1.36824
Anastrozole	1.36859
Sulfaphenazole	1.3749
Emedastine	1.37501
Irsogladine maleate	1.37938
Tiletamine hydrochloride	1.37981
Mebhydroline 1,5-naphtalenedisulfonate	1.38505
Sulfadiazine	1.39022
Docetaxel	1.39039
Tocainide hydrochloride	1.3923
Piribedil hydrochloride	1.39276
Progesterone	1.39544
Citalopram Hydrobromide	1.39593
Aripiprazole	1.39663
Pentamidine isethionate	1.39994
Novobiocin sodium salt	1.40027
Thioproperazine dimesylate	1.40431
Nefopam hydrochloride	1.40431
Remoxipride Hydrochloride	1.40595
Methyldopate hydrochloride	1.40707
Trolox	1.40721
Ivermectin	1.40791
Dilazep dihydrochloride	1.40791
Promazine hydrochloride	1.41363
Cyclophosphamide	1.41521
Sparfloxacin	1.41728
Phenacetin	1.42287
Mepenzolate bromide	1.42762
Dipyrone	1.42762
Pyridostigmine iodide	1.42873
Argatroban	1.4289
Methenamine	1.42923
Lincomycin hydrochloride	1.43471
Debrisoquin sulfate	1.43631
Cefoxitin sodium salt	1.43731
Methyldopa (L,-)	1.44235
Torsemide	1.44382
Risperidone	1.4479
Fludarabine	1.45734
Mitotane	1.45914
Pirlindole mesylate	1.4608
Benzamil hydrochloride	1.46105
Finasteride	1.46105
Ethambutol dihydrochloride	1.46533
Linezolid	1.46668
Prenylamine lactate	1.47287
Nilvadipine	1.4745
Benzethonium chloride	1.4745
Dinoprost trometamol	1.47681
Sildenafil	1.47711
Secnidazole	1.47937
Sulfamerazine	1.48121
Articaine hydrochloride	1.48498
Reboxetine mesylate	1.48886
Zaprinast	1.49419
Telmisartan	1.49823
Brompheniramine maleate	1.50701
Chloroxine	1.52282
Scopolamin-N-oxide hydrobromide	1.52282
Olopatadine hydrochloride	1.52327
Naloxone hydrochloride	1.52405
Midodrine hydrochloride	1.52405
Thiamine hydrochloride	1.53222
Ibudilast	1.53582
Isradipine	1.54125
Nomegestrol acetate	1.54527
Melatonin	1.5506
Levetiracetam	1.55215
Closantel	1.55952
Fluconazole	1.58321
Pirenperone	1.58446
Diclofenac sodium	1.58829
Primaquine diphosphate	1.58938
Olmesartan	1.59368
Cefmetazole sodium salt	1.59844
Vecuronium bromide	1.60479
Candesartan	1.60519
Paclitaxel	1.60534
Fadrozole hydrochloride	1.60534
Repaglinide	1.61278
Celecoxib	1.61398
Josamycin	1.61734
Chlorphensin carbamate	1.61734
Benztropine mesylate	1.63494
Imiquimod	1.6611
Piracetam	1.66395
Tetracaïne hydrochloride	1.68
Letrozole	1.70294
Fluoxetine hydrochloride	1.70774
Itopride	1.70813
Montelukast	1.72641
Azithromycin	1.72993
Tylosin	1.73196
Famciclovir	1.74145
Felodipine	1.74823
Clarithromycin	1.77702
Zaleplon	1.78831
Metronidazole	1.78997
Isoniazid	1.78997
Hexachlorophene	1.79347
Gemcitabine	1.8047
Losartan	1.81708
Isometheptene mucate	1.82842
Raclopride	1.8319
Tulobuterol	1.83277
Thiocolchicoside	1.85922
Tobramycin	1.85993
Khellin	1.87502
Tranexamic acid	1.87502
Troglitazone	1.88808
Chlorpheniramine maleate	1.89515
Metaraminol bitartrate	1.89515
Cilnidipine	1.91811
Meclozine dihydrochloride	1.92871
Vatalanib	1.99685
Fosinopril	2.00027
Mesna	2.02496
Carprofen	2.05153
5-fluorouracil	2.05912
Idebenone	2.077
Nalbuphine hydrochloride	2.08173
Salbutamol	2.08173
Isoquinoline, 6,7-dimethoxy-1-methyl-1,2,3,4-tetrahydro, hydrochloride	2.11239
Loratadine	2.19975
Granisetron	2.20717
Dopamine hydrochloride	2.24173
Enoxacin	2.25452
Rifampicin	2.26354
Tenatoprazole	2.31789
Rebamipide	2.41009
Diphenylpyraline hydrochloride	2.41009
Rosiglitazone Hydrochloride	2.46059
Xylazine	2.53353
Lamotrigine	2.59137
Ciprofibrate	2.63296
Triamcinolone	2.74767
Camptothecine (S,+)	2.74767
Butamben	2.84433
Triclosan	2.86409
Desloratadine	3.03589
Acetylsalicylic acid	3.28536
Camylofine chlorhydrate	3.40326
Dacarbazine	3.64506
Fenipentol	3.7159
Loracarbef	3.85829
Bromhexine hydrochloride	4.52165
Hydroxychloroquine sulfate	4.66841
Acipimox	4.92332
Acamprosate calcium	5.59526
Diflorasone Diacetate	5.74665
Thiorphan	6.25374
Astemizole	7.10308
Etoricoxib	12.3243
Alendronate sodium	13.0685
Atorvastatin	13.7942

## Sheet: ICCB lib
Name	Normalized ratio
C8 Ceramine	0
13(S)-HPODE	0
17-Phenyl-trinor-prostaglandin E2	0
1-Stearoyl-2-arachidonoyl-glycerol	0
24,25-Dihydroxyvitamin D3	0
25-Hydroxyvitamin D3	0
9(S)-HPODE	0
9,10-Octadecenoamide	0
9alpha,11beta-Prostaglandin F2	0
Dimethyloxaloylglycine	0
C8 Dihydroceramide	0
Carbacyclin	0
Clofibrate	0
Ascomycin (FK-520)	0
Gliotoxin	0
Trichostatin-A	0
Triptolide	0.0014016
FK-506	0.00165055
5,8,11-Eicosatriynoic acid	0.00721322
Adrenic acid (22:4, n-6)	0.0126724
Phenoxybenzamine	0.0141959
13(S)-HODE	0.0170499
MG-132	0.0200356
C2 Dihydroceramide	0.0342998
Cloprostenol Na	0.05172
Dexamethasone	0.0521441
6-Keto-prostaglandin F1a	0.052965
5,8,11,14-Eicosatetraynoic acid	0.0635359
9beta,11alpha-Prostaglandin F2	0.0684105
Arachidonamide	0.0755677
Cerulenin	0.0780039
Mycophenolic acid	0.0836528
17-Allylamino-geldanamycin	0.0944511
12-Methoxydodecanoic acid	0.0952956
5,6-Epoxyeicosatrienoic acid	0.0959438
Calyculin A	0.0966424
Nigericin	0.0973742
NS-398	0.101156
C2 Ceramide	0.106227
7,7-Dimethyleicosadienoic acid	0.110718
Oligomycin A	0.129753
Arachidonic acid (20:4, n-6)	0.134797
2-Hydroxymyristic acid	0.13803
9-cis Retinoic acid	0.145551
Ciglitazone	0.147183
Valinomycin	0.163998
2-Arachidonoylglycerol	0.168581
Helenalin	0.171422
Shikonin	0.17392
LY-83583	0.174111
Doxorubicin	0.177678
Wortmannin	0.178194
AA-861	0.180535
1-Oleoyl-2-acetyl-glycerol	0.181674
Cyclosporin A	0.190514
C8 Ceramide	0.202928
Yohimbine	0.210303
BML-190	0.217873
Vinblastine	0.220225
CDC	0.220225
Anandamide (22:4,n-6)	0.225382
W7	0.247651
8,9-Epoxyeicosatrienoic acid	0.25107
Anandamide (18:2,n-6)	0.252713
1,25-Dihydroxyvitamin D3	0.279608
12(S)-HPETE	0.281347
Latrunculin B	0.283079
17-Octadecynoic acid	0.290608
K252A	0.292311
Anandamide (20:4, n-6)	0.309696
8-EPI-prostaglandin F2a	0.310079
Cytochalasin B	0.317402
Anisomycin	0.320721
Actinomycin D	0.322918
Monensin	0.333018
Z-Leu3-VS	0.352524
Y-27632	0.356797
Xestospongin C	0.373335
15(S)-HETE	0.373503
6-Formylindolo [3,2-B] carbazole	0.374547
Tunicamycin	0.37591
Tyrphostin 9	0.377258
9(S)-HODE	0.40208
5(S)-HETE	0.40468
1-Hexadecyl-2-O-acetyl-glycerol	0.412085
Anandamide (20:3,n-6)	0.421726
5-Ketoeicosatetraenoic acid	0.422227
Rapamycin	0.425906
C16 Ceramide	0.43436
4-Hydroxyphenylretinamide	0.436817
5(S)-HPETE	0.440272
Parthenolide	0.446981
Diphenyleneiodonium Cl	0.450429
4-Oxatetradecanoic acid	0.465119
AM-580	0.470815
1-Stearoyl-2-linoleoyl-glycerol	0.49265
1-Acyl-PAF	0.503738
U-0126	0.505633
YS035	0.532288
Z-VAD-FMK	0.535401
GW-5074	0.53915
ML9	0.548311
Manumycin A	0.551147
MCI-186	0.553656
Cycloheximide	0.559956
5-Iodotubercidin	0.56009
Brefeldin A	0.573184
E-64-d	0.581678
Linoleamide	0.581741
15d-Prostaglandin J2	0.583753
GF-109203X	0.584842
Okadaic acid	0.607257
Fumonisin B1	0.610638
Pimozide	0.615271
Phentolamine	0.626498
Furoxan	0.629058
2-Fluoropalmitic acid	0.649947
Mastoparan	0.650723
Arachidonoyl-PAF	0.651829
Cantharidin	0.656098
Dibutyrylcyclic GMP	0.657556
LFM-A13	0.665556
Bafilomycin A1	0.669556
U73122	0.671007
A-23187	0.671923
Hoechst 33342 (cell permeable) (BisBenzimide)	0.674765
Nitrendipine	0.682512
AM-251	0.684038
Taxol = Paclitaxel	0.691329
Manoalide	0.694458
LY-294002	0.71289
Monastrol	0.71518
Verapamil	0.715586
SKF-96365	0.72095
Phenytoin	0.735317
ZM336372	0.740464
AGC	0.741874
16,16-Dimethyl-prostaglandin E2	0.747242
ICRF-193	0.762394
Prostaglandin A2	0.766561
MBCQ	0.777834
Juglone	0.778588
Niguldipine	0.779486
Lidocaine	0.780406
NSC-95397	0.786913
ZM226600	0.789546
Mitomycin C	0.791853
N-Arachidonoylglycine	0.792389
PAF C16	0.792981
Wiskostatin	0.793383
Leupeptin	0.794026
Fipronil	0.801187
Niflumic acid	0.803668
Flecainide	0.806965
Flufenamic acid	0.808992
1-Octadecyl-2-methylglycero-3 PC	0.812159
Thalidomide	0.813992
MDL-28170	0.820061
IAA-94	0.821663
Nifedipine	0.823409
Bromo-cAMP [8-Bromo-cAMP]	0.826357
Ala-Ala-Phe-CMK	0.828484
Prostaglandin E1	0.831625
Genistein	0.832361
MAPP, D-erythro	0.83292
Chelerythrine	0.843992
Veratridine	0.846097
Ryanodine	0.847414
Quinine	0.850613
Propranolol (S-)	0.854511
U-37883A	0.859553
Nimodipine	0.862273
Thiocitrulline [L-Thiocitrulline HCl]	0.863866
Pepstatin	0.86978
Lipoxin A4	0.871235
AGGC	0.872874
AM 92016	0.873737
Minoxidil sulfate	0.873747
12(R)-HETE	0.873937
L-NAME	0.874305
Ac-Leu-Leu-Nle-CHO	0.877356
13,14-Dihydro-prostaglandin E1	0.880893
Boc-GVV-CHO	0.885363
N,N-Dimethylsphingosine	0.890393
Dichlorobenzamil	0.892825
Deoxymannojirimycin(1)	0.895444
1400W	0.896385
U-50488	0.897003
Phosphatidic acid, dipalmitoyl	0.898069
FCCP	0.900307
Bay 11-7082	0.90572
Tolazamide	0.908106
Retinoic acid, all trans	0.910293
Gingerol	0.920195
Cypermethrin	0.921589
Diazoxide	0.923642
HA1077	0.92773
Bumetanide	0.928794
Linolenic acid (18:3 n-3)	0.932965
DRB	0.936459
Swainsonine	0.938003
SDZ-201106	0.940192
E6 Berbamine	0.940561
Dibutyrylcyclic AMP	0.940561
Huperzine A [(-)-Huperzine A]	0.942346
WY-14643	0.943841
D609	0.946713
IBMX	0.947643
NapSul-Ile-Trp-CHO	0.949833
Clozapine	0.951359
Etoposide	0.960043
Cyclopiazonic acid	0.963075
Prostaglandin A1	0.967274
Penitrem A	0.967884
Paxilline	0.968131
Aristolochic acid	0.968794
Leukotriene B4	0.969152
BAPTA-AM	0.973722
ML7	0.974209
N9-Isopropylolomoucine	0.977307
Tetrandrine	0.978113
Pinacidil	0.97943
MAPP, L-erythro	0.979795
Phenamil	0.983429
Bepridil	0.98416
Aminobenzamide (3-ABA) [3-Aminobenzamide (3-ABA)]	0.984172
15-Ketoeicosatetraenoic acid	0.985282
Ouabain	0.985686
PD 98059	0.989851
SQ-29548	0.990577
MnTBAP	0.99183
L-NASPA	0.992567
Leukotriene E4	0.994696
QX-314	0.996461
KT-5720	0.997133
DL-PPMP	0.998656
DMSO	1
Calphostin C	1.00293
Quercetin	1.0059
Epibatidine (±)	1.00671
Forskolin	1.00878
Tyrphostin-8	1.00939
Dihydrosphingosine	1.01174
B581	1.01416
YC-1	1.01439
Tanshinone IIA	1.01441
3,4-Dichloroisocoumarin	1.02137
Trequinsin	1.02263
SU-4312	1.02282
PCO-400	1.02328
Histamine	1.02362
L-cis-Diltiazem	1.02481
Lavendustin A	1.02665
E-4031	1.03049
BADGE	1.03123
Glyburide	1.0314
H-89	1.03201
1-Hexadecyl-2-arachidonoyl-glycerol	1.03748
PAF C18:1	1.03884
Leukotriene D4	1.0394
Decoyinine	1.04105
Arvanil	1.04129
Roscovitine	1.04533
HNMPA-(AM)3	1.0493
Tyrphostin AG-126	1.05797
Geldanamycin	1.05908
Glipizide	1.0614
Z-Prolyl-prolinal	1.06276
Diltiazem	1.06546
Betulinic acid	1.0691
KN-62	1.07311
Thapsigargin	1.07324
Tamoxifen	1.07684
Cyclo [Arg-Gly-Asp-D-Phe-Val]	1.0819
AG-879	1.08303
Milrinone	1.08742
CAPE	1.08768
Alrestatin	1.08897
U-75302	1.09255
Piceatannol	1.09379
Linoleic acid	1.09474
Nocodazole	1.09483
Grayanotoxin III	1.09739
Prostaglandin I2 Na	1.10075
Olomoucine	1.10229
Tolbutamide	1.1027
NPPB	1.10446
HBDDE	1.10886
S-Farnesyl-L-cysteine methyl ester	1.11592
Tyrphostin AG-825	1.11863
Fluspiriline	1.1202
Nimesulide	1.12126
Mead acid (20:3 n-9)	1.12241
Indomethacin	1.12442
Methoprene acid	1.12454
Kavain (±)	1.12672
Deprenyl	1.12816
Acetyl (N)-S-farnesyl-L-cysteine	1.13136
WIN 55,212-2	1.13716
Bestatin	1.13846
EHNA HCl	1.13943
HA-1004	1.13978
PCA 4248	1.13994
BW-B 70C	1.14108
Capsazepine	1.14316
Clonidine	1.1456
Alamethicin	1.14674
24(S)-Hydroxycholesterol	1.14984
Misoprostol, free acid	1.15221
CGP-37157	1.15341
Nicardipine	1.16381
SB-415286	1.16534
Ro 31-8220	1.1658
Diindolylmethane	1.16611
GW-9662	1.1723
AG213 (Tyrphostin 47)	1.1753
Zaprinast	1.17719
Prazocin	1.17742
Amiloride	1.17752
Tyrphostin 1	1.17794
Lyso-PAF C16	1.18202
Pregnenolone 16a carbonitrile	1.18432
SB-431542	1.1889
5-Hydroxydecanoate	1.19664
Propafenone	1.19999
TRIM	1.20422
Benzamil	1.20514
RK-682	1.2059
CITCO	1.20639
Sphingosine	1.21364
N-Linoleoylglycine	1.21629
Palmitylethanolamide	1.21787
Loperamide	1.21994
Mevinolin (Lovastatin)	1.22146
GM6001	1.22292
AG-490	1.22363
Rottlerin	1.22682
PAF C18	1.22694
SQ22536	1.2332
DL-Dihydrosphingosine	1.23687
Ionomycin	1.23747
Tosyl-Phe-CMK (TPCK)	1.24088
Puromycin	1.24187
Procainamide	1.24497
Damnacanthal	1.24612
10-Hydroxycamptothecin	1.24944
IB-MECA	1.25003
N-Acetyl-leukotriene E4	1.25316
Prostaglandin J2	1.25809
Quinidine	1.25918
Bongkrekic acid	1.25947
6,7-ADTN HBr	1.26048
Methoxy verapamil	1.26054
Docosahexaenoic acid (22:6 n-3)	1.26062
RHC-80267	1.26444
Dantrolene	1.26496
OBAA	1.26712
Lycorine	1.27337
Delta 12-Prostaglandin J2	1.27468
Eicosapentaenoic acid (20:5 n-3)	1.27516
Propidium iodide	1.27736
Mead ethanolamide	1.27993
Indirubin-3'-monoxime	1.28973
Hinokitiol	1.29124
TMB-8	1.29352
b-Lapachone	1.29945
Zardaverine	1.30136
U-46619	1.30286
Go6976	1.30379
Castanospermine	1.30714
Serotonin	1.31125
Cirazoline	1.31218
Capsacin(E)	1.31234
Methotrexate	1.31885
Vinpocetine	1.32194
REV-5901	1.3241
TTNPB	1.33048
Leukotoxin B (12,13-EODE)	1.33741
H9	1.34815
Aphidicolin	1.34885
H7	1.34885
Cimaterol	1.34992
Bromo-cGMP [8-Bromo-cGMP]	1.35359
Docosapentaenoic acid	1.35392
Rolipram	1.354
Trifluoperazine	1.35452
NS-1619	1.3564
1,2-Didecanoyl-glycerol (10:0)	1.35766
2-Methoxyantimycin A3	1.35859
SP-600125	1.3594
Leukotriene C4	1.36295
Tetrahydrocannabinol-7-oic acid	1.37296
Cytochalasin D	1.37327
Leukotoxin A (9,10-EODE)	1.37355
HA14-1	1.37689
Cyclopamine	1.38442
Nafamostst mesylate	1.38822
Splitomycin	1.39055
CA-074-Me	1.39695
AG1478	1.39938
1-Hexadecyl-2-O-methyl-glycerol	1.41064
CinnGEL 2Me	1.41288
Estradiol	1.41453
g-Linolenic acid (18:3 n-6)	1.41523
Curcumin	1.41581
Decylubiquinone	1.41714
RG-14620	1.42057
AG-1296	1.42574
L-744,832	1.4259
Prostaglandin B2	1.42864
Prostaglandin F2a	1.42903
Prostaglandin F1a	1.43751
LY-171883	1.43958
Fluprostenol	1.4431
Ebselen	1.44515
Cycloheximide-N-ethylethanoate	1.44826
Enantio-PAF C16	1.44916
Eicosa-5,8-dienoic acid (20:2 n-12)	1.45086
DL-PDMP	1.4511
SB 203580	1.47031
Minoxidil	1.47225
Flunarizine	1.483
Dipyridamole	1.48738
FPL-64176	1.49304
8-Methoxymethyl-IBMX	1.50657
Staurosporine	1.50953
Blebbistatin	1.51331
Phenanthridinone [6(5H)-Phenanthridinone]	1.51715
4-Aminopyridine	1.52804
PP1	1.53173
N-Phenylanthranilic acid	1.53875
Bay K-8644	1.54291
Calpeptin	1.55083
Indirubin	1.55098
Thiorphan	1.55127
A-3	1.55316
Amino-1,8-naphthalimide [4-Amino-1,8-naphthalimide]	1.55755
Farnesylthioacetic acid	1.56403
Piroxicam	1.5732
RWJ-60475-(AM)3	1.5737
5'-N-Ethylcarboxamidoadenosine (NECA)	1.57419
TPEN	1.57423
Ro 20-1724	1.5899
C-PAF	1.60353
1,2-Dioctanoyl-sn-glycerol	1.60423
AG-370	1.61247
Prostaglandin B1	1.61318
Camptothecin	1.6159
Deoxynorjrimycin(1)	1.64602
Resveratrol	1.65406
Aconitine	1.65763
Bromo-7-nitroindazole [3-Bromo-7-nitroindazole]	1.67528
Siguazodan	1.67795
2,5-Ditertbutylhydroquinone	1.68088
PRIMA-1	1.68717
11,12-Epoxyeicosatrienoic acid	1.68769
Dihomo-gamma-linolenic acid	1.68835
Prostaglandin E2	1.71236
Docosatrienoic acid (22:3 n-3)	1.71913
Prostaglandin D2	1.77939
Amiodarone	1.80633
Bezafibrate	1.81312
Lysophosphatidic acid	1.81635
PP2	1.87198
13-cis Retinoic acid	1.89287
Eicosatrienoic acid (20:3 n-3)	1.90669
U-74389G	1.93897
SB 202190	1.94135
Amantidine	1.97203
Pifithrin	2.07326
13-Ketooctadecadienoic acid	2.145
Eicosadienoic acid (20:2 n-6)	2.19144
1-Hexadecyl-2-methylglycero-3 PC	2.27407
MY-5445	2.40552
14,15-Epoxyeicosatrienoic acid	2.41799
(R)-Methanandamide	2.51884
12(S)-HETE	3.08221
1,2-Dioleoyl-glycerol (18:1)	3.19837
15(S)-HPETE	3.61949
Phorbol 12 myristate 13 acetate	4.0761
Ikarugamyin	8.30631
